# Supplementary material for: Application of Polysaccharide‐Based Columns for the Separation of Racemic Mixtures Obtained Based on (R,S)‐2‐Octanol by Reversed‐Phase Chiral Liquid Chromatography
Source: Preprints.org preprint supplement (doi:10.20944/preprints202403.0796.v1), 2024-03-14
Supplement: Supplementary file 1 [file supplementary]

**Supplementary materials for the article**

**Application of polysaccharide-based columns for the separation of racemic mixtures obtained based on (R,S)-2-octanol by reversed-phase chiral liquid chromatography**

Magdalena Urbańska*

*Institute of Chemistry,* *Military University of Technology, Kaliskiego 2, 00-908 Warsaw, Poland*

**Corresponding author: Magdalena Urbańska, e-mail:* [*magdalena.urbanska@wat.edu.pl*](mailto:magdalena.urbanska@wat.edu.pl)

**NUMBER OF THEORETICAL PLATES, SELECTIVITY OF RACEMIC MIXTURES, AND SOME CHROMATOGRAMS**

The number of theoretical plates, corresponding chromatograms, and selectivity for both columns are shown in Figures S1-S42.

**Figure S1.** Theoretical plate values on the MIG column in the isocratic elution, ACN/H2O (99:1 v/v), the flow rate 1 mL·min-1.


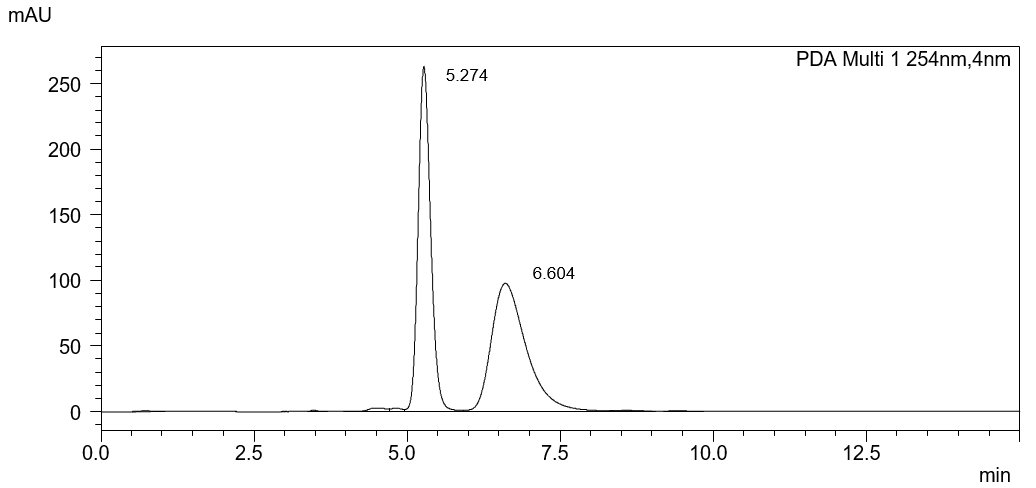


**Figure S2.** Chromatogram of the mixture 6.(HF) (R,S) obtained on the MIG column in the isocratic elution, ACN/H2O (99:1 v/v), the flow rate 1 mL·min-1.


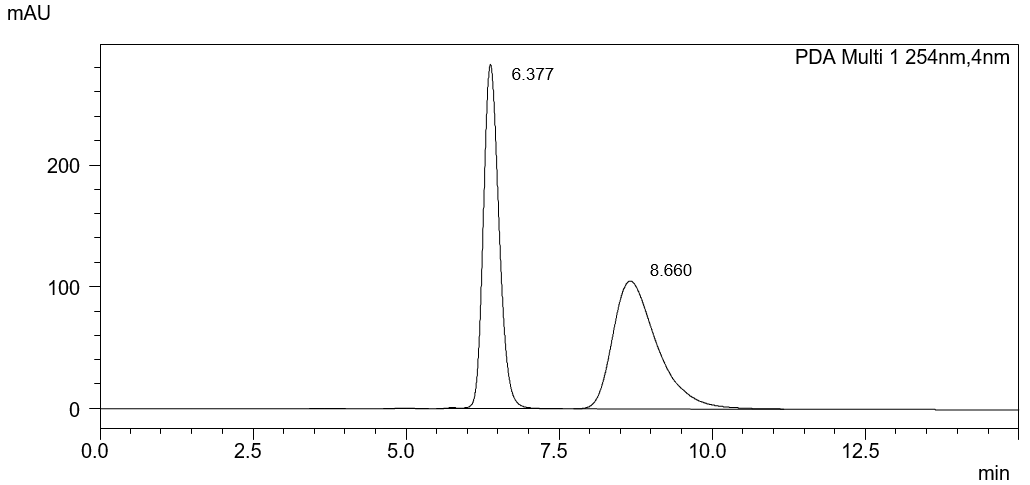


**Figure S3.** Chromatogram of the mixture 6.(HH) (R,S) obtained on the MIG column in the isocratic elution, ACN/H2O (99:1 v/v), the flow rate 1 mL·min-1.

**Figure S4.** Selectivity values on the MIG column in the isocratic elution, ACN/H2O (99:1 v/v), the flow rate 1 mL·min-1.


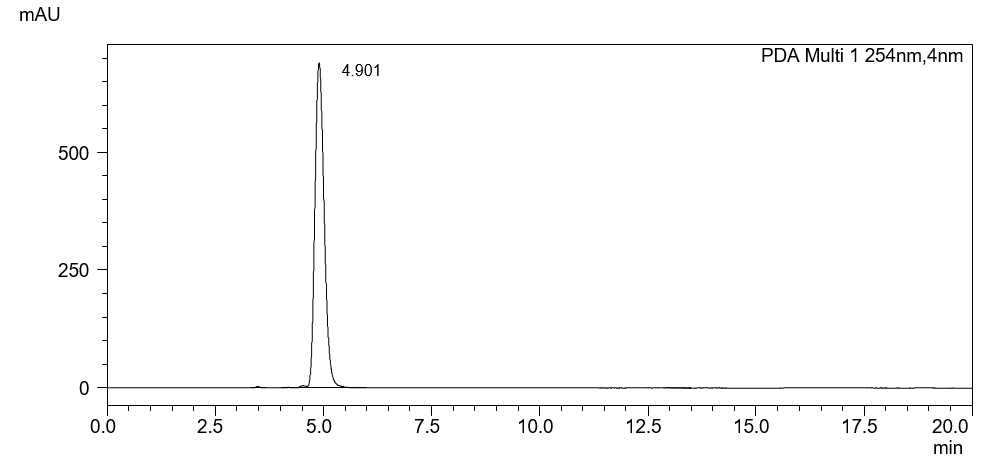


**Figure S5.** Chromatogram of the mixture 3.(FF) (R,S) obtained on the MIG column in the isocratic elution, ACN/H2O (95:5 v/v), the flow rate 1 mL·min-1.


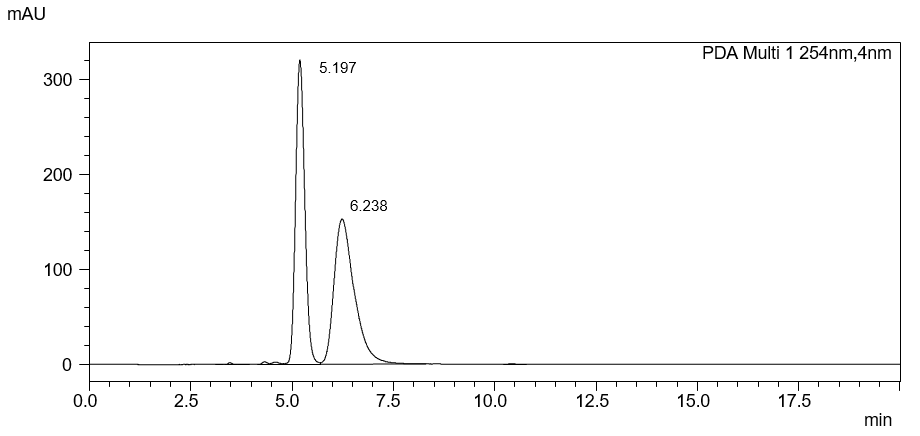
 **Figure S6.** Chromatogram of the mixture 2.(HF) (R,S) obtained on the MIG column in the isocratic elution, ACN/H2O (95:5 v/v), the flow rate 1 mL·min-1.


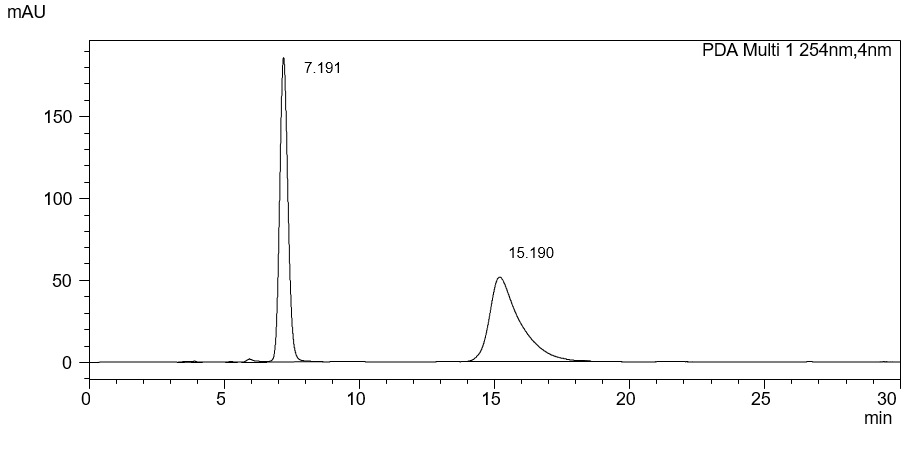


**Figure S7.** Chromatogram of the mixture 5.(HH) (R,S) obtained on the MIG column in the isocratic elution, ACN/H2O (95:5 v/v), the flow rate 1 mL·min-1.

**Figure S8.** Theoretical plate values on the MIG column in the isocratic elution, ACN/H2O (95:5 v/v), the flow rate 1 mL·min-1.


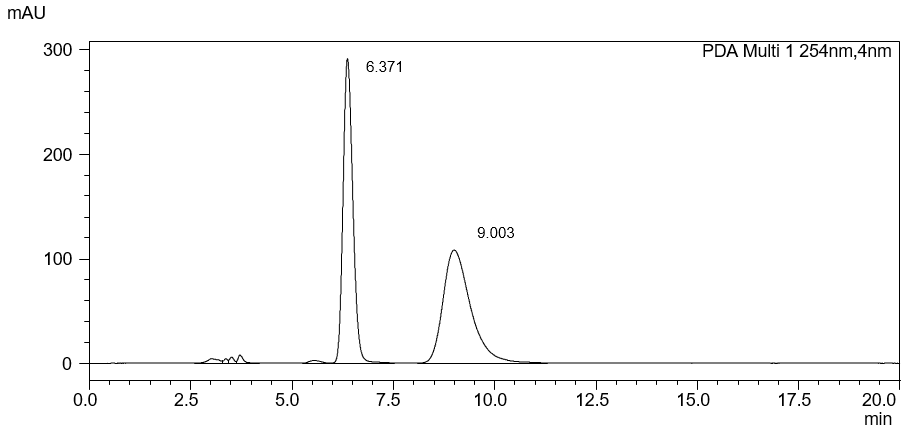
 **Figure S9.** Chromatogram of the mixture 3.(HH) (R,S) obtained on the MIG column in the isocratic elution, ACN/H2O (95:5 v/v), the flow rate 1 mL·min-1.


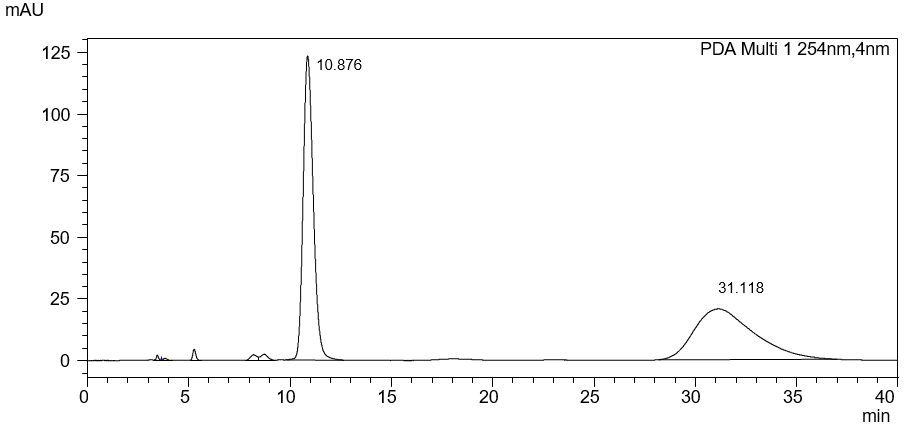


**Figure S10.** Chromatogram of the mixture 7.(HH) (R,S) obtained on the MIG column in the isocratic elution, ACN/H2O (95:5 v/v), the flow rate 1 mL·min-1.

**Figure S11.** Selectivity values on the MIG column in the isocratic elution, ACN/H2O (95:5 v/v), the flow rate 1 mL·min-1.

**Figure S12.** Theoretical plate values on the MIG column in the isocratic elution, ACN/H2O (90:10 v/v), the flow rate 1 mL·min-1.


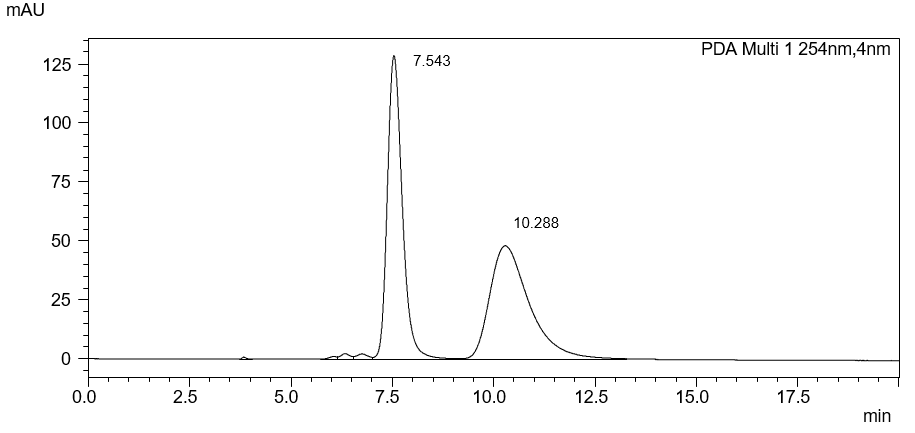


**Figure S13.** Chromatogram of the mixture 7.(HH) (R,S) obtained on the MIG column in the isocratic elution, ACN/H2O (90:10 v/v), the flow rate 1 mL·min-1.

**Figure S14.** Selectivity values on the MIG column in the isocratic elution, ACN/H2O (90:10 v/v), the flow rate 1 mL·min-1.

**Figure S15.** Theoretical plate values on the MIG column in the decreasing gradient, the flow rate 1 mL·min-1.


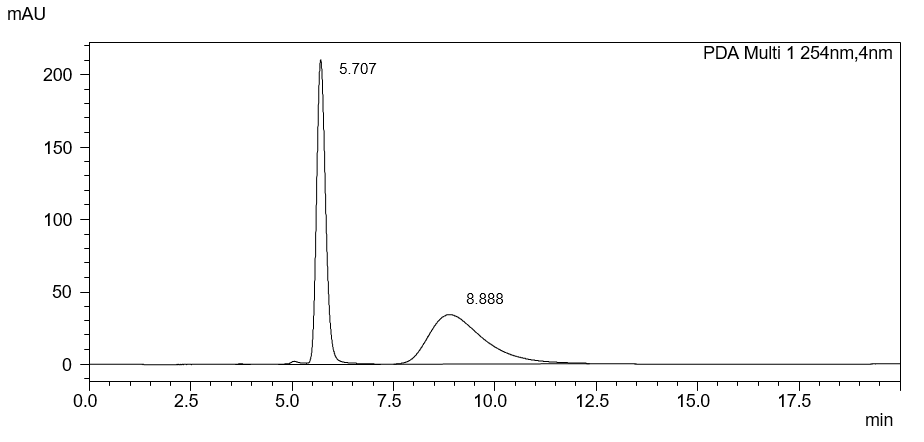


**Figure S16.** Chromatogram of the mixture 5.(HH) (R,S) obtained on the MIG column in the decreasing gradient, the flow rate 1 mL·min-1.


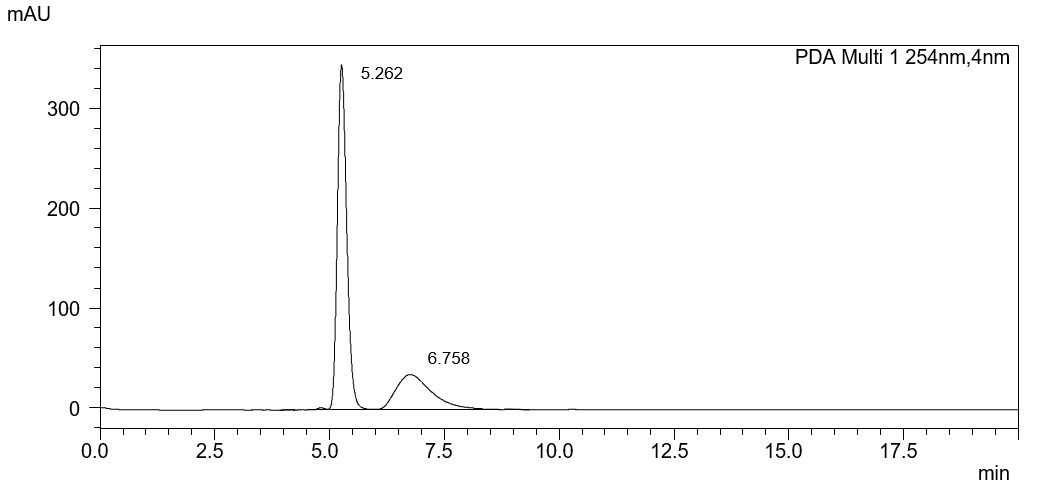


**Figure S16.** Chromatogram of the mixture 6.(FH) (R,S) obtained on the MIG column in the decreasing gradient, the flow rate 1 mL·min-1.

**Figure S17.** Selectivity values on the MIG column in the decreasing gradient, the flow rate 1 mL·min-1.

**Figure S18.** The resolution data obtained for the studied racemic mixtures on the MIC column in the isocratic elution, ACN/H2O (99:1 v/v).


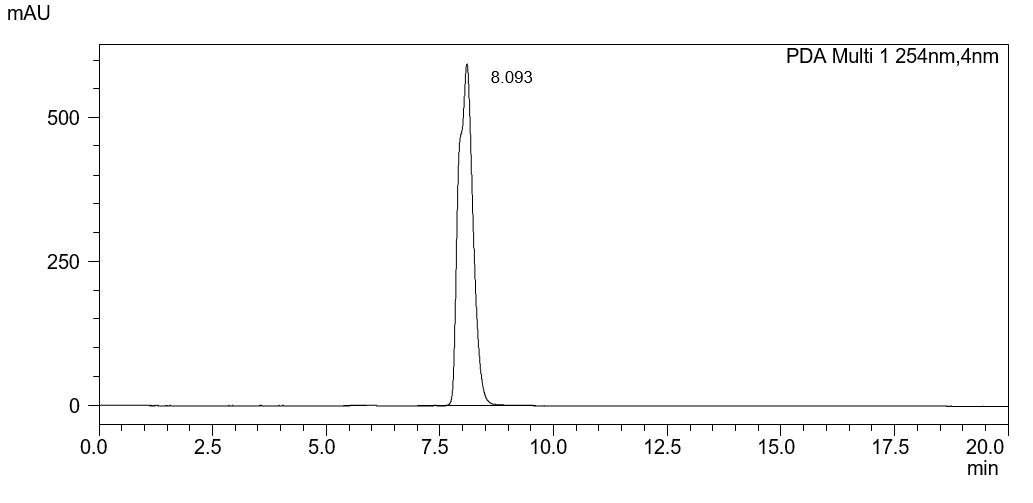


**Figure S19.** Chromatogram of the mixture 2.(FH) (R,S) obtained on the MIC column in the isocratic elution, ACN/H2O (99:1 v/v), the flow rate 0.5 mL·min-1.


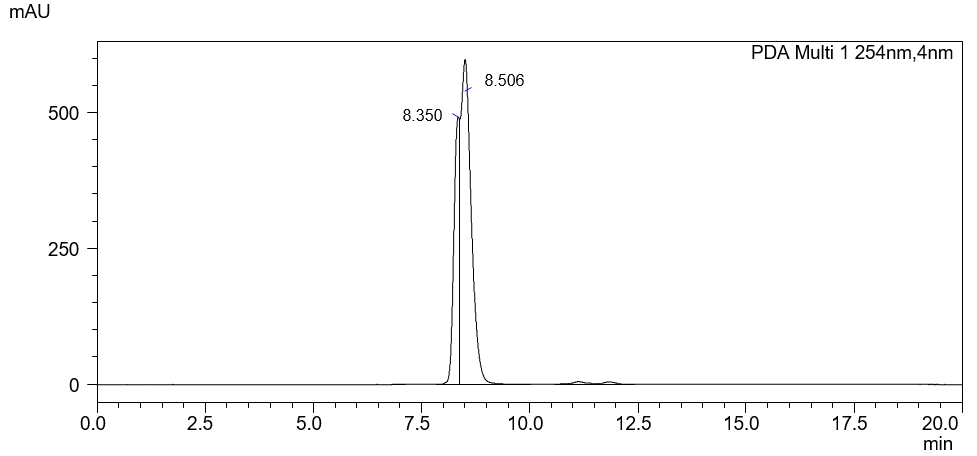


**Figure S20.** Chromatogram of the mixture 5.(FF) (R,S) obtained on the MIC column in the isocratic elution, ACN/H2O (99:1 v/v), the flow rate 0.5 mL·min-1.

**Figure S21.** The retention times of the racemic mixtures on the MIC column in the isocratic elution, ACN/H2O, (99:1 v/v).

**Figure S22.** Selectivity values on the MIC column in the isocratic elution, ACN/H2O (99:1 v/v), the flow rate 0.5 mL·min-1.

**Figure S23.** The resolution data obtained for the studied racemic mixtures on the MIC column in the isocratic elution, ACN/H2O, (95:5 v/v).


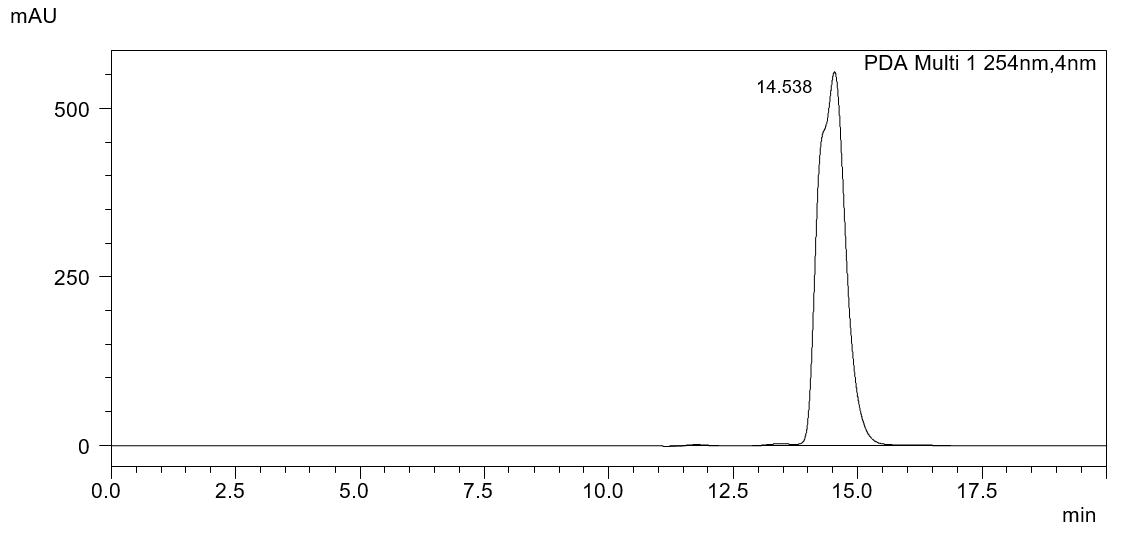


**Figure S24.** Chromatogram of the mixture 2.(HH) (R,S) obtained on the MIC column in the isocratic elution, ACN/H2O (95:5 v/v), the flow rate 0.3 mL·min-1.


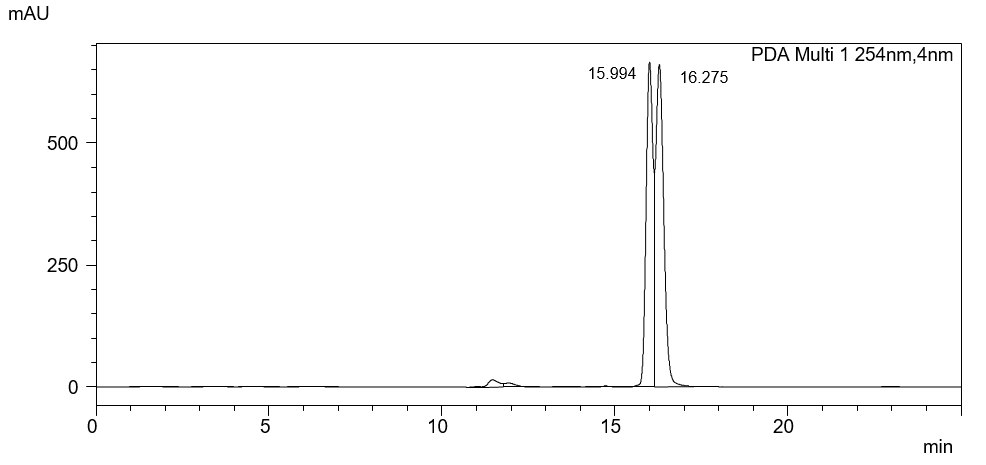


**Figure S25.** Chromatogram of the mixture 3.(HH) (R,S) obtained on the MIC column in the isocratic elution, ACN/H2O (95:5 v/v), the flow rate 0.3 mL·min-1.

**Figure S26.** The retention times of the racemic mixtures on the MIC column in the isocratic elution, ACN/H2O, (95:5 v/v).

**Figure S27.** Selectivity values on the MIC column in the isocratic elution, ACN/H2O (95:5 v/v), the flow rate 0.3 mL·min-1.

**Figure S28.** The resolution data obtained for the studied racemic mixtures on the MIC column in the isocratic elution, ACN/H2O, (90:10 v/v).


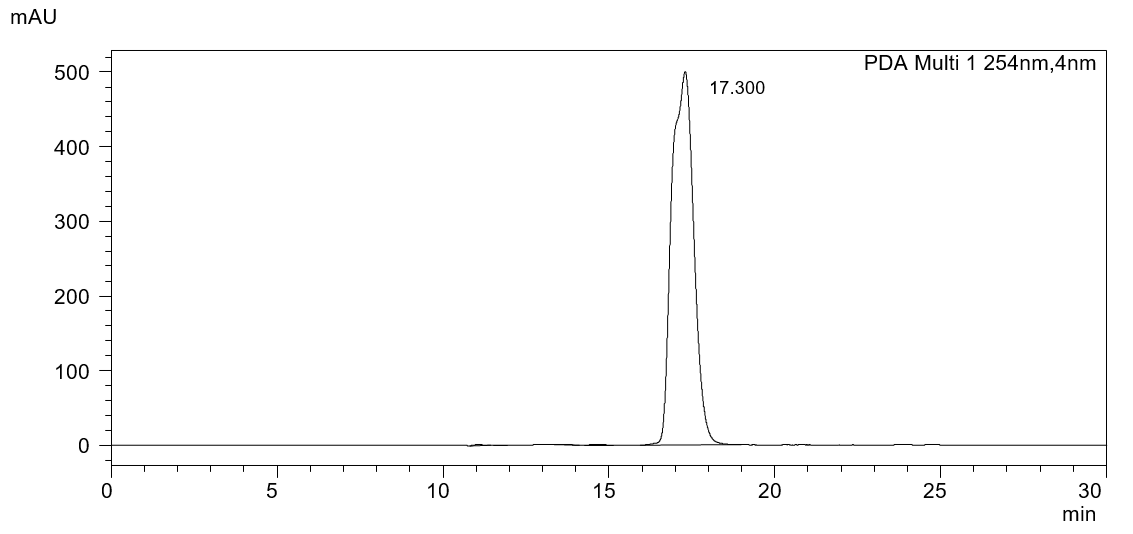


**Figure S29.** Chromatogram of the mixture 2.(FH) (R,S) obtained on the MIC column in the isocratic elution, ACN/H2O (90:10 v/v), the flow rate 0.3 mL·min-1.


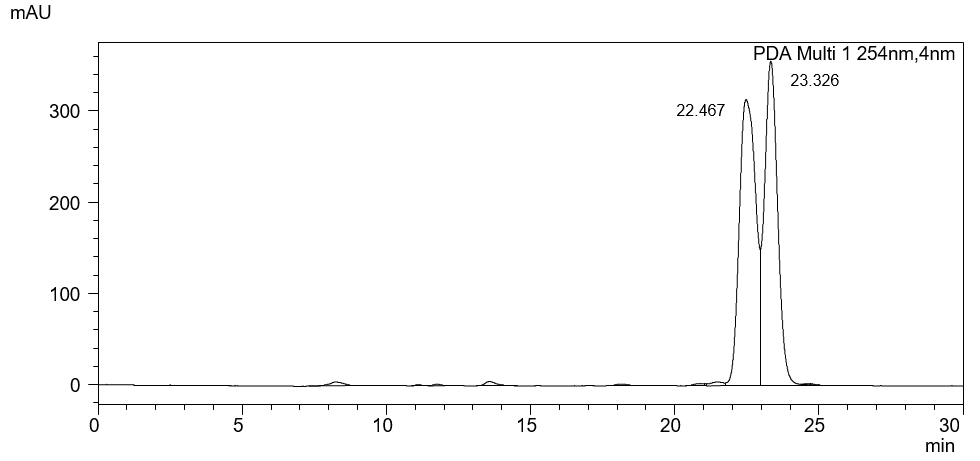


**Figure S30.** Chromatogram of the mixture 7.(HF) (R,S) obtained on the MIC column in the isocratic elution, ACN/H2O (90:10 v/v), the flow rate 0.3 mL·min-1.

**Figure S31.** The retention times of the racemic mixtures on the MIC column in the isocratic elution, ACN/H2O, (90:10 v/v).

**Figure S32.** Selectivity values on the MIC column in the isocratic elution, ACN/H2O (90:10 v/v), the flow rate 0.3 mL·min-1.

**Figure S33.** The resolution data obtained for the studied racemic mixtures on the MIC column in the decreasing gradient.


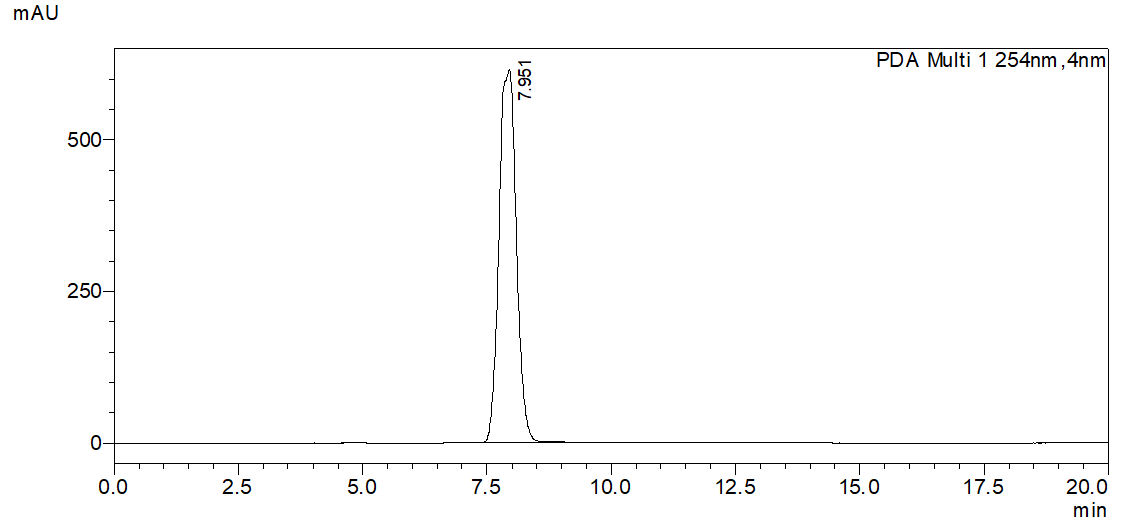


**Figure S34.** Chromatogram of the mixture 2.(FH) (R,S) obtained on the MIC column in the decreasing gradient, the flow rate 1 mL·min-1.


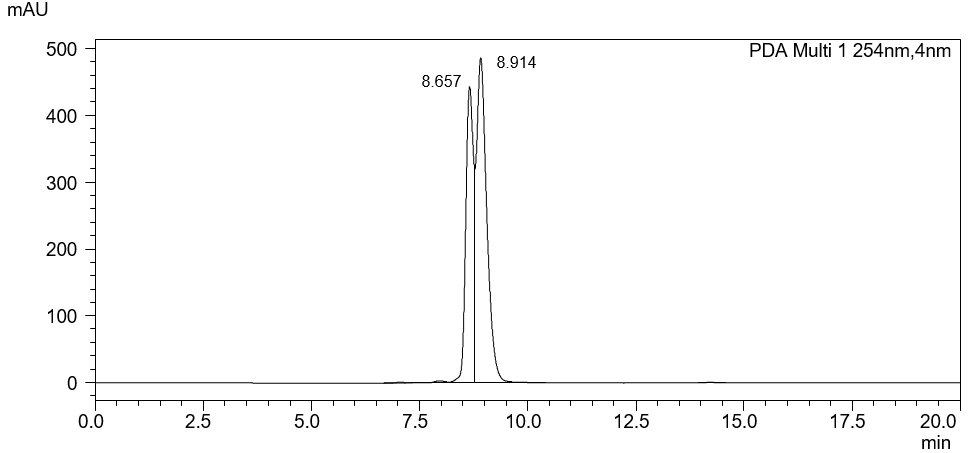


**Figure S35.** Chromatogram of the mixture 7.(HF) (R,S) obtained on the MIC column in the decreasing gradient, the flow rate 1 mL·min-1.

**Figure S36.** The retention times of the racemic mixtures on the MIC column in decreasing gradient.

**Figure S37.** Selectivity values on the MIC column in the decreasing gradient, the flow rate 1 mL·min-1.

**Figure S38.** The resolution data obtained for the studied racemic mixtures on the MIC column in the increasing-decreasing gradient.


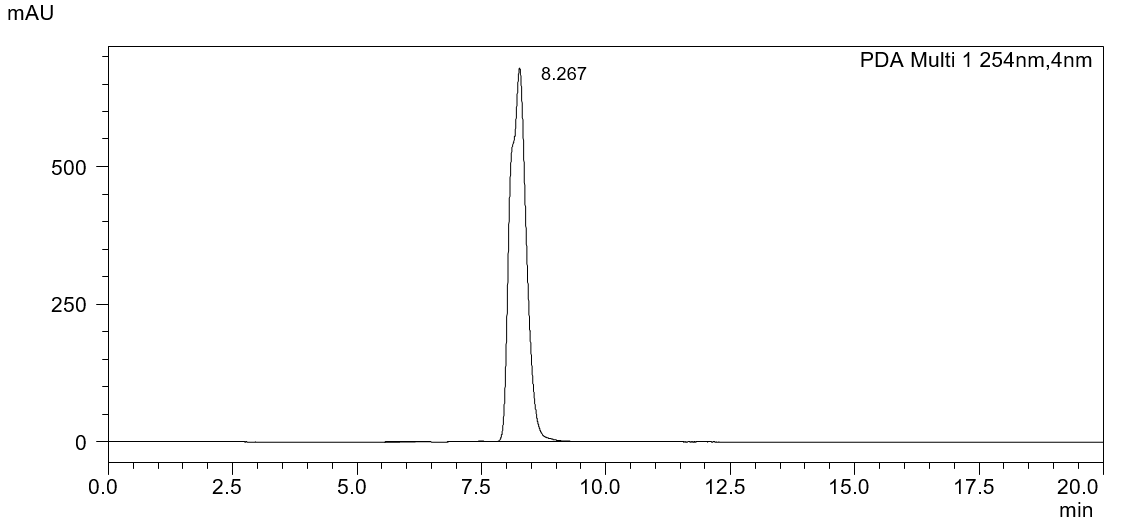


**Figure S39.** Chromatogram of the mixture 2.(HF) (R,S) obtained on the MIC column in the increasing-decreasing gradient, the flow rate 1 mL·min-1.


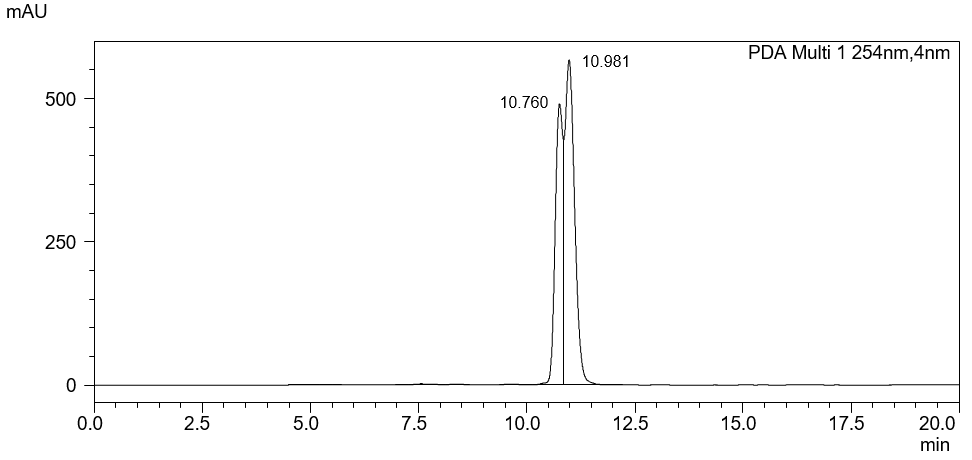


**Figure S40.** Chromatogram of the mixture 5.(HH) (R,S) obtained on the MIC column in the increasing-decreasing gradient, the flow rate 1 mL·min-1.

**Figure S41.** The retention times of the racemic mixtures on the MIC column in increasing-decreasing gradient.

**Figure S42.** Selectivity values on the MIC column in the increasing-decreasing gradient, the flow rate 1 mL·min-1.
